# Supplementary material
Source: publisher site journal article supplement (https://www.dovepress.com/get_supplementary_file.php?f=345299.xlsx)
Supplement: Supplementary file 1 [file get_supplementary_file.php]

## Sheet: Sheet1
Target Rank	Target Score	miRNA Name	Gene Symbol	Gene Description
1	89	hsa-miR-1909-3p	OTOP2	otopetrin 2
2	89	hsa-miR-6722-3p	OTOP2	otopetrin 2
3	81	hsa-miR-3148	OTOP2	otopetrin 2
4	75	hsa-miR-619-3p	OTOP2	otopetrin 2
5	64	hsa-miR-330-5p	OTOP2	otopetrin 2
6	64	hsa-miR-326	OTOP2	otopetrin 2
7	63	hsa-miR-875-3p	OTOP2	otopetrin 2
8	63	hsa-miR-4450	OTOP2	otopetrin 2
9	60	hsa-miR-4651	OTOP2	otopetrin 2
10	60	hsa-miR-608	OTOP2	otopetrin 2
11	59	hsa-miR-1252-5p	OTOP2	otopetrin 2
12	54	hsa-miR-4758-3p	OTOP2	otopetrin 2
13	52	hsa-miR-6777-3p	OTOP2	otopetrin 2
